# Supplementary material for: Novel Combinations of Human Immunomodulatory mAbs Lacking Cardiotoxic Effects for Therapy of TNBC
Source: MDPI journal article supplement (doi:10.3390/cancers14010121), 2021-12-27
Supplement: s1 [file s1]

# Novel Combinations of Human Immunomodulatory mAbs Lacking Cardiotoxic Effects for Therapy of TNBC

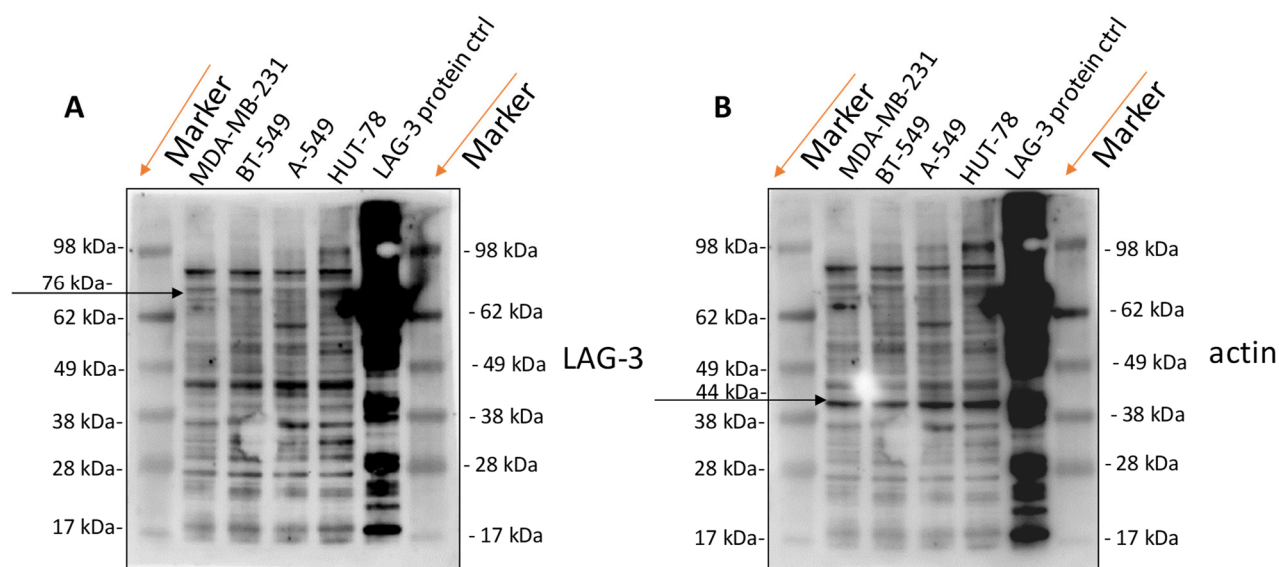

**Figure S1.** Full length blots of Figure 7B. **(A)** Western blot for detection of LAG-3 levels in the indicated cell extracts: the full length filter was stained with an anti-LAG-3 mAb. **(B)** Western blot for detection of actin levels in the indicated cell extracts: the same filter was then stained with an anti-Actin mAb. The intensity of the bands was normalized to actin. A marker for M.W. reference (17, 28, 38, 49, 62 and 98 kDa) was included.

**Table S1.** Analysis by densitometry of Western Blot of Figure S1 (relative to Figure 7B). Intensity signals of the bands were calculated by Image Lab software.

|                                     | MDA-MB-231 | BT-549  | A-549   | HuT-78  |
|-------------------------------------|------------|---------|---------|---------|
| LAG-3 protein densitometry readings | 31057      | 33490   | 31852   | 80970   |
| ACTIN protein densitometry readings | 111155     | 108898  | 180998  | 203184  |
| Intensity Ratio of LAG-3/ACTIN      | 0,2794     | 0,30754 | 0,17598 | 0,39851 |
